# Supplementary material for: Acicular nanoparticles formed through coprecipitation of iron salts in the presence of bovine serum albumin
Source: Royal Society of Chemistry journal article supplement (doi:10.1039/c1jm12387d), 2011-01-01
Supplement: c1jm12387d.pdf [file c1jm12387d.pdf]

# Supporting Information

## Experimental

### *Precipitation of Iron Oxide*

Stock reagents were prepared as follows; FeSO<sub>4</sub> 2mMol/ml, FeCl<sub>3</sub> 1.3mMol, and NaOH 266mMol/ml, BSA stock was varied from 0-1mMol/ml. The Fe<sup>3+</sup>:Fe<sup>2+</sup> ratio was thus 2:3. Except in the case of BSA, magnetic stirring at 750rpm for 5 min was sufficient for full dissolution, 30 min stirring under gentle heating was required for the most concentrated BSA stock. BSA, FeSO<sub>4</sub> and then FeCl<sub>3</sub> were added to a reaction vessel before dropwise addition of NaOH over 1 min to induce precipitation. The resulting solution was then sealed by a finger tight cap in a glass sample container (both 8 and 24ml sample volumes) and allowed to age under ambient laboratory conditions.

Initial investigations of the affect of BSA inclusion in iron salt coprecipitation demonstrated a visually evident interaction between FeCl<sub>3</sub> and the protein solution during sample preparation. Upon addition of FeCl<sub>3</sub> the solution (for BSA 0.2-1.0mMol/ml) became cloudy and rust coloured, and gelatinous white globular material precipitated immediately but dissolved within 5 min of formation. This interaction

is attributed to Fe<sup>3+</sup> binding by BSA, however we note that in supplementary investigations increasing the iron salt concentration by orders of magnitude shows that FeSO<sub>4</sub> alone is sufficient to induce globularisation. It has been satisfactorily confirmed that the protein globularisation is not due solely to pH change, however iron adsorption may induce a conformational change in the protein that favours globularisation in low pH solution. The dropwise addition of NaOH was made immediately after FeCl<sub>3</sub> addition and thus before the dissolution of the globular material.

### *Sample Characterisation*

TEM images were obtained by a Jeol 1200EX instrument operated at 80keV, additional imagery and energy dispersive x-ray spectroscopy was achieved by a Phillips TECNAI F20 operated at 200keV. For all images 20l of solution was deposited by pipette on to a carbon film copper grid (Agar). Magnetic properties were measured at room temperature by (VSM) (Lakeshore, 7400). FITR was obtained by a Thermo Electron Corporation Nicolet380 FTIR with a Smart Orbit Diamond 30,000-200cm<sup>-1</sup> accessory.
